# Supplementary material
Source: publisher figshare collection journal article supplement (https://acs.figshare.com/ndownloader/files/8616403)
Supplement: Supplementary file 1 [file 8616403]

## *Supporting information*

### Anti-scaling magnetic slippery surfaces

*Ali Masoudi, Peyman Irajizad, Nazanin Farokhnia, Varun Kashyap, and Hadi Ghasemi\**

Department of Mechanical Engineering, University of Houston, 4726 Calhoun Rd, Houston,  
Texas, 77204-4006, USA

**E-mail:** [hghasemi@uh.edu](mailto:hghasemi@uh.edu)

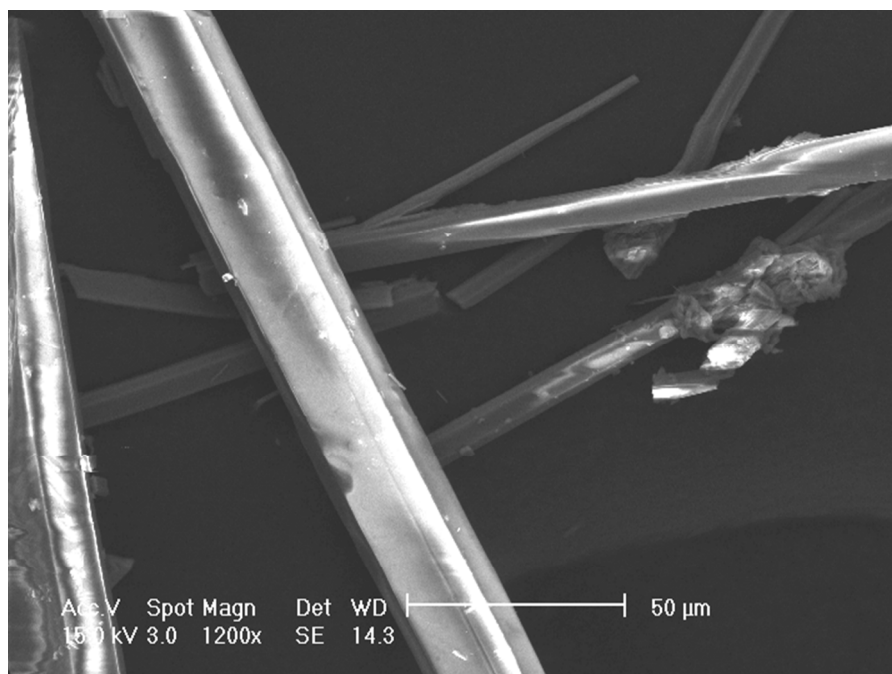

**Figure S1.** Structure of needle-like calcium sulfate scale formed on the samples is shown.

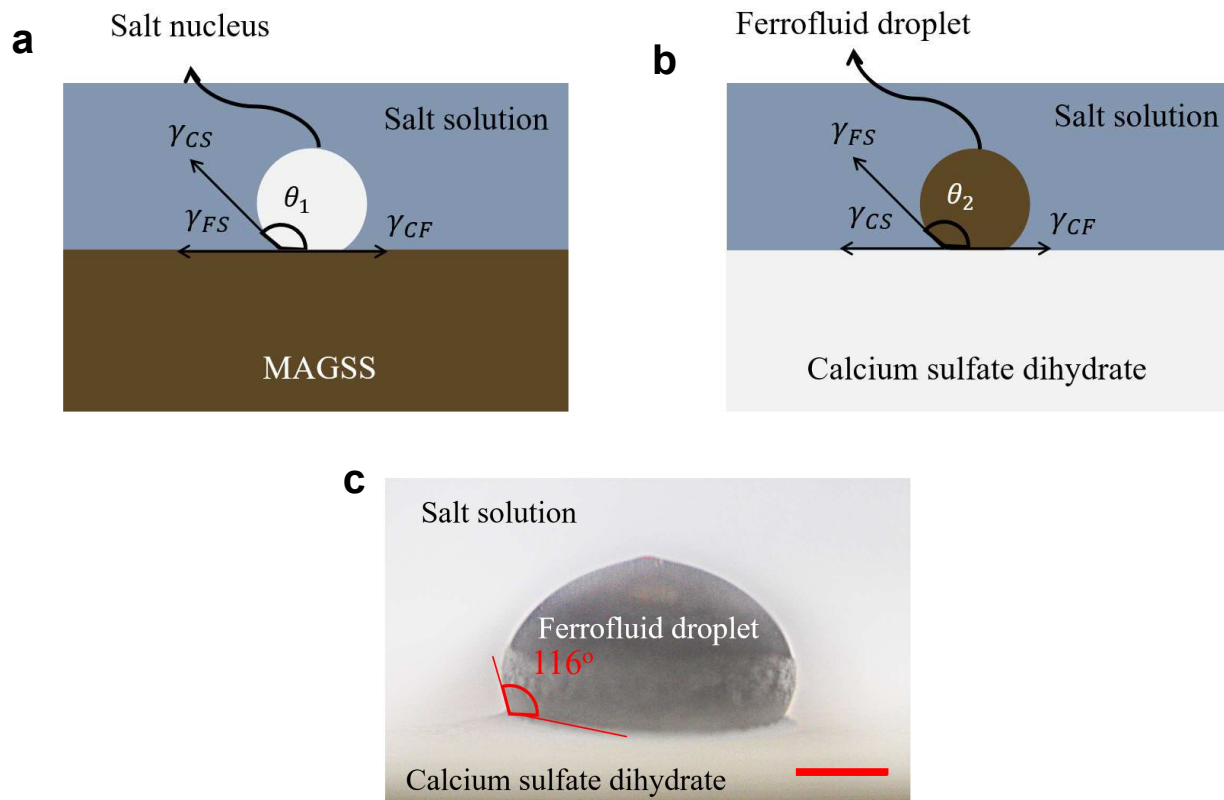

**Figure S2.** (a) Schematic of salt nucleation on MAGSS in a liquid salt solution (b) Schematic of contact angle and interfacial forces for a ferrofluid droplet on a salt substrate in a liquid salt solution (c) Demonstration of ferrofluid droplet contact angle on the salt substrate in a liquid salt solution environment. The error in contact angle measurements was  $5^\circ$ . The scale bar is 1 mm.

## The method for determination of Gibbs energy barrier for scale nucleation on liquid-liquid interfaces

To determine value of  $f$  function, one needs to determine the value of  $m$  and  $x$ . The  $f(m,x)$  function is written as<sup>1</sup>

$$f(m, x) = \frac{1}{2} \left\{ 1 + \left( \frac{1 - mx}{g} \right)^3 + x^3 \left[ 2 - 3 \left( \frac{x - m}{g} \right) + \left( \frac{x - m}{g} \right)^3 \right] + 3mx^2 \left( \frac{x - m}{g} - 1 \right) \right\} \quad (S1)$$

Where

$$g = (1 + x^2 - 2mx)^{1/2} \quad (S2)$$

and  $m = \cos(\theta_1)$ ,  $x = \frac{R}{r_c}$ , and  $r_c = \frac{2\gamma_l}{\Delta G_v}$ , where  $R$  denotes radius of roughness at the surface,  $r_c$  the critical nucleus size,  $\gamma_l$  the interfacial tension of nucleus-liquid and  $\Delta G_v$  the volumetric free energy of phase-change.

As the developed MAGSS surface is smooth at the molecular scale, the value of  $x \gg 1$ . In this regime, function  $f$  becomes independent of  $x$  and only value of  $m$  is required to determine  $f$  value. Here, we have developed an approach to determine the value of  $m$ . We consider two cases as shown in **Figure S2 (a) and (b)**. The first case considers a salt nucleus on MAGSS and the second case considers a droplet of ferrofluid on the calcium sulfate salt substrate. For both cases the medium is a saturated salt solution. The interfacial force balance equations are written as

$$\gamma_{CF} - \gamma_{FS} + \gamma_{CS} \cos \theta_1 = 0 \quad (S3)$$

$$\gamma_{CF} - \gamma_{CS} + \gamma_{FS} \cos \theta_2 = 0 \quad (\text{S4})$$

Where  $\gamma_{CF}$  is the calcium sulfate salt nucleus-MAGSS interfacial tension,  $\gamma_{FS}$  is the MAGSS (ferrofluid)-salt solution interfacial tension, and  $\gamma_{CS}$  the interfacial tension of calcium salt nucleolus-saturated liquid. By subtraction of these two equations and knowing  $m = \cos \theta_1$ , one finds

$$m = (1 + \cos \theta_2) \left( \frac{\gamma_{FS}}{\gamma_{CS}} \right) - 1 \quad (\text{S5})$$

We developed an experimental setup to measure  $\theta_2$  as shown in **Figure S2 (c)**. Smooth layer of salt was placed at the bottom of beaker and then filled with 100 ml of saturated solution. We tried to develop a smooth surface and eliminate the role of roughness on the contact angle. A droplet of 0.01 ml ferrofluid was deposited on the salt substrate. The contact angle of ferrofluid droplet on salt ( $\theta_2$ ) in a salt solution medium was measured with a digital camera (Canon DSLR) as shown in **Figure S2 (c)**. We conducted this experiment for more than five times to obtain an average value of contact angle. The standard deviation of measured contact angles was  $5^\circ$ . The value of  $\gamma_{FS}$  was measured as  $22.8 \pm 0.1 \text{ mNm}^{-1}$  with Tensiometer (Biolin Scientific, Sigma 701). Value of  $\gamma_{CS}$  is reported as  $95 \text{ mNm}^{-1}$ .<sup>2,3</sup> Having all these parameters, we found that the value of  $m = -0.86 \pm 0.02$  and function of  $f(m, x)$  through Equation S1 is  $0.98 \pm 0.02$ .

## References

- (1) Fletcher, N. H. Size Effect in Heterogeneous Nucleation. *J. Chem. Phys.* **1958**, 29, 572.
- (2) Nielsen, A. E. *Kinetics of Precipitation*; Pergamon Press: Oxford, 1964.
- (3) Nielsen, A. E.; Sohnel, O. Interfacial Tensions Electrolyte Crystal-aqueous Solution, from Nucleation Data. *J. Cryst. Growth* **1971**, 11, 233–242.
